# Supplementary material
Source: publisher figshare collection journal article supplement (https://sage.figshare.com/ndownloader/files/24449300)
Supplement: Supplementary file 1 [file 24449300]

***Replication Code for "The Impact of Economic Coercion on Public Opinion: The Case of US-China Currency Relations"


**Figure 1
ciplot fx_appreciate if q_totalduration>300, by(fx_treat) 


**Figure 2
reg fx_appreciate i.fx_treat if q_totalduration>300 & antiamerican>2
margins, dydx(i.fx_treat)
marginsplot, name(hiantius, replace)

reg fx_appreciate i.fx_treat if q_totalduration>300 & antiamerican<3
margins, dydx(i.fx_treat)
marginsplot, name(lowantius, replace)

reg fx_appreciate i.fx_treat if q_totalduration>300 & usadversary==1
margins, dydx(i.fx_treat)P
marginsplot, name(hiusadv, replace)

reg fx_appreciate i.fx_treat if q_totalduration>300 & usadversary==0
margins, dydx(i.fx_treat)
marginsplot, name(lousadv, replace)

graph combine lowantius hiantius lousadv hiusadv, ycommon cols(2)


**Figure 3
reg fx_appreciate i.fx_treat if q_totalduration>300 & fie==1
margins, dydx(i.fx_treat)
marginsplot, name(fie, replace)
reg fx_appreciate i.fx_treat if q_totalduration>300 & fie==0
margins, dydx(i.fx_treat)
marginsplot, name(nonfie, replace)

reg fx_appreciate i.fx_treat if q_totalduration>300 & q117==1
margins, dydx(i.fx_treat)
marginsplot, name(intlfirm, replace)
reg fx_appreciate i.fx_treat if q_totalduration>300 & q117==0
margins, dydx(i.fx_treat)
marginsplot, name(domfirm, replace)

reg fx_appreciate i.fx_treat if q_totalduration>300 & exporter==1
margins, dydx(i.fx_treat)
marginsplot, name(exporter, replace)
reg fx_appreciate i.fx_treat if q_totalduration>300 & exporter==0
margins, dydx(i.fx_treat)
marginsplot, name(nonexporter, replace)

graph combine nonfie fie domfirm intlfirm nonexporter exporter, ycommon cols(2)


**Figure 4
reg fx_appreciate i.fx_treat if q_totalduration>300 & q32==5
margins, dydx(i.fx_treat)
marginsplot, name(highnationalism, replace)
reg fx_appreciate i.fx_treat if q_totalduration>300 & q32<5
margins, dydx(i.fx_treat)
marginsplot, name(lownationalism, replace)

reg fx_appreciate i.fx_treat if q_totalduration>300 & q33>3 
margins, dydx(i.fx_treat)
marginsplot, name(highculture, replace)
reg fx_appreciate i.fx_treat if q_totalduration>300 & q33<4
margins, dydx(i.fx_treat)
marginsplot, name(lowculture, replace)

reg fx_appreciate i.fx_treat if q_totalduration>300 & q34>3 
margins, dydx(i.fx_treat)
marginsplot, name(highchinapeople, replace)
reg fx_appreciate i.fx_treat if q_totalduration>300 & q34<4
margins, dydx(i.fx_treat)
marginsplot, name(lowchinapeople, replace)

graph combine lownationalism highnationalism lowculture highculture lowchinapeople highchinapeople, ycommon cols(2)


**Figure 5
ciplot q92 if q_totalduration>300, by(fx_treat) name(tradewar, replace)
ciplot q93 if q_totalduration>300, by(fx_treat) name(usecon, replace)
ciplot q94 if q_totalduration>300, by(fx_treat) name(chinaecon, replace)
ciplot q95 if q_totalduration>300, by(fx_treat) name(chinarep, replace)
graph combine tradewar chinarep chinaecon usecon, ycommon


**Table 2
*Benefit American Economy
medeff (regress q93 fxtreatthreat fxtreatencourage) (regress fx_appreciate q93 fxtreatthreat fxtreatencourage) if q_totalduration>300, treat(fxtreatencourage) mediate(q93) level(90)
medeff (regress q93 fxtreatthreat fxtreatencourage) (regress fx_appreciate q93 fxtreatthreat fxtreatencourage) if q_totalduration>300, treat(fxtreatthreat) mediate(q93) level(90)
medeff (regress q93 fxtreatthreat fxtreatencourage) (regress fx_appreciate q93 fxtreatthreat fxtreatencourage) if q_totalduration>300 & antiamericand==1, treat(fxtreatencourage) mediate(q93) level(90)
medeff (regress q93 fxtreatthreat fxtreatencourage) (regress fx_appreciate q93 fxtreatthreat fxtreatencourage) if q_totalduration>300 & antiamericand==1, treat(fxtreatthreat) mediate(q93) level(90)
medeff (regress q93 fxtreatthreat fxtreatencourage) (regress fx_appreciate q93 fxtreatthreat fxtreatencourage) if q_totalduration>300 & antiamericand==0, treat(fxtreatencourage) mediate(q93) level(90)
medeff (regress q93 fxtreatthreat fxtreatencourage) (regress fx_appreciate q93 fxtreatthreat fxtreatencourage) if q_totalduration>300 & antiamericand==0, treat(fxtreatthreat) mediate(q93) level(90)

*Benefit Chinese Economy
medeff (regress q94 fxtreatthreat fxtreatencourage) (regress fx_appreciate q94 fxtreatthreat fxtreatencourage) if q_totalduration>300, treat(fxtreatencourage) mediate(q94) level(90)
medeff (regress q94 fxtreatthreat fxtreatencourage) (regress fx_appreciate q94 fxtreatthreat fxtreatencourage) if q_totalduration>300, treat(fxtreatthreat) mediate(q94) level(90)
medeff (regress q94 fxtreatthreat fxtreatencourage) (regress fx_appreciate q94 fxtreatthreat fxtreatencourage) if q_totalduration>300 & antiamericand==1, treat(fxtreatencourage) mediate(q94) level(90)
medeff (regress q94 fxtreatthreat fxtreatencourage) (regress fx_appreciate q94 fxtreatthreat fxtreatencourage) if q_totalduration>300 & antiamericand==1, treat(fxtreatthreat) mediate(q94) level(90)
medeff (regress q94 fxtreatthreat fxtreatencourage) (regress fx_appreciate q94 fxtreatthreat fxtreatencourage) if q_totalduration>300 & antiamericand==0, treat(fxtreatencourage) mediate(q94) level(90)
medeff (regress q94 fxtreatthreat fxtreatencourage) (regress fx_appreciate q94 fxtreatthreat fxtreatencourage) if q_totalduration>300 & antiamericand==0, treat(fxtreatthreat) mediate(q94) level(90)

*Improve China's Reputation
medeff (regress q95 fxtreatthreat fxtreatencourage) (regress fx_appreciate q95 fxtreatthreat fxtreatencourage) if q_totalduration>300, treat(fxtreatencourage) mediate(q95) level(90)
medeff (regress q95 fxtreatthreat fxtreatencourage) (regress fx_appreciate q95 fxtreatthreat fxtreatencourage) if q_totalduration>300, treat(fxtreatthreat) mediate(q95) level(90)
medeff (regress q95 fxtreatthreat fxtreatencourage) (regress fx_appreciate q95 fxtreatthreat fxtreatencourage) if q_totalduration>300 & antiamericand==1, treat(fxtreatencourage) mediate(q95) level(90)
medeff (regress q95 fxtreatthreat fxtreatencourage) (regress fx_appreciate q95 fxtreatthreat fxtreatencourage) if q_totalduration>300 & antiamericand==1, treat(fxtreatthreat) mediate(q95) level(90)
medeff (regress q95 fxtreatthreat fxtreatencourage) (regress fx_appreciate q95 fxtreatthreat fxtreatencourage) if q_totalduration>300 & antiamericand==0, treat(fxtreatencourage) mediate(q95) level(90)
medeff (regress q95 fxtreatthreat fxtreatencourage) (regress fx_appreciate q95 fxtreatthreat fxtreatencourage) if q_totalduration>300 & antiamericand==0, treat(fxtreatthreat) mediate(q95) level(90)

*Improve Trade Relations
medeff (regress q92 fxtreatthreat fxtreatencourage) (regress fx_appreciate q92 fxtreatthreat fxtreatencourage) if q_totalduration>300, treat(fxtreatencourage) mediate(q92) level(90)
medeff (regress q92 fxtreatthreat fxtreatencourage) (regress fx_appreciate q92 fxtreatthreat fxtreatencourage) if q_totalduration>300, treat(fxtreatthreat) mediate(q92) level(90)
medeff (regress q92 fxtreatthreat fxtreatencourage) (regress fx_appreciate q92 fxtreatthreat fxtreatencourage) if q_totalduration>300 & antiamericand==1, treat(fxtreatencourage) mediate(q92) level(90)
medeff (regress q92 fxtreatthreat fxtreatencourage) (regress fx_appreciate q92 fxtreatthreat fxtreatencourage) if q_totalduration>300 & antiamericand==1, treat(fxtreatthreat) mediate(q92) level(90)
medeff (regress q92 fxtreatthreat fxtreatencourage) (regress fx_appreciate q92 fxtreatthreat fxtreatencourage) if q_totalduration>300 & antiamericand==0, treat(fxtreatencourage) mediate(q92) level(90)
medeff (regress q92 fxtreatthreat fxtreatencourage) (regress fx_appreciate q92 fxtreatthreat fxtreatencourage) if q_totalduration>300 & antiamericand==0, treat(fxtreatthreat) mediate(q92) level(90)


**Table C1
reg fx_appreciate q92 q93 q94 q95 fie q117 exporter q119_40 q115 ccpapproval antiamerican nationalism q111 q113  fxtreatencourage fxtreatthreat 


**Figure C1
predict resid1, residuals
gen resid1abs = abs(resid1)
lowess resid1abs q_totalduration, name(lowess, replace)


**Figure D1
ciplot q92, by(fx_treat) name(tradewar, replace)
ciplot q93 , by(fx_treat) name(usecon, replace)
ciplot q94 , by(fx_treat) name(chinaecon, replace)
ciplot q95, by(fx_treat) name(chinarep, replace)
graph combine chinaecon chinarep tradewar usecon, ycommon


*Figure D2
ciplot q92 if q_totalduration>240, by(fx_treat) name(tradewar, replace)
ciplot q93 if q_totalduration>240, by(fx_treat) name(usecon, replace)
ciplot q94 if q_totalduration>240, by(fx_treat) name(chinaecon, replace)
ciplot q95 if q_totalduration>240, by(fx_treat) name(chinarep, replace)
graph combine chinaecon chinarep tradewar usecon, ycommon


*Figure D3
ciplot q92 if q_totalduration>360, by(fx_treat) name(tradewar, replace)
ciplot q93 if q_totalduration>360, by(fx_treat) name(usecon, replace)
ciplot q94 if q_totalduration>360, by(fx_treat) name(chinaecon, replace)
ciplot q95 if q_totalduration>360, by(fx_treat) name(chinarep, replace)
graph combine chinaecon chinarep tradewar usecon, ycommon

*Figure D4
reg fx_appreciate i.fx_treat if antiamericand==1
margins, dydx(i.fx_treat)
marginsplot, name(hiantius, replace)

reg fx_appreciate i.fx_treat if antiamericand==0
margins, dydx(i.fx_treat)
marginsplot, name(lowantius, replace)

reg fx_appreciate i.fx_treat if usadversary==1
margins, dydx(i.fx_treat)
marginsplot, name(hiusadv, replace)

reg fx_appreciate i.fx_treat if usadversary==0
margins, dydx(i.fx_treat)
marginsplot, name(lousadv, replace)

graph combine lowantius hiantius lousadv hiusadv, ycommon cols(2)


**Figure D5
reg fx_appreciate i.fx_treat if q_totalduration>240 & antiamericand==1
margins, dydx(i.fx_treat)
marginsplot, name(hiantius, replace)

reg fx_appreciate i.fx_treat if q_totalduration>240 & antiamericand==0
margins, dydx(i.fx_treat)
marginsplot, name(lowantius, replace)

reg fx_appreciate i.fx_treat if q_totalduration>240 & usadversary==1
margins, dydx(i.fx_treat)
marginsplot, name(hiusadv, replace)

reg fx_appreciate i.fx_treat if q_totalduration>240 & usadversary==0
margins, dydx(i.fx_treat)
marginsplot, name(lousadv, replace)

graph combine lowantius hiantius lousadv hiusadv, ycommon cols(2)


**Figure D6
reg fx_appreciate i.fx_treat if q_totalduration>360 & antiamericand==1
margins, dydx(i.fx_treat)
marginsplot, name(hiantius, replace)

reg fx_appreciate i.fx_treat if q_totalduration>360 & antiamericand==0
margins, dydx(i.fx_treat)
marginsplot, name(lowantius, replace)

reg fx_appreciate i.fx_treat if q_totalduration>360 & usadversary==1
margins, dydx(i.fx_treat)
marginsplot, name(hiusadv, replace)

reg fx_appreciate i.fx_treat if q_totalduration>360 & usadversary==0
margins, dydx(i.fx_treat)
marginsplot, name(lousadv, replace)

graph combine lowantius hiantius lousadv hiusadv, ycommon cols(2)


**Table E1
mlogit fx_treat fie q117 exporter q119_40 q115 ccpapproval antiamerican nationalism q111 q113 


**Table F1
reg q94 i.fx_treat fie q117 exporter q119_40 q115 ccpapproval antiamerican nationalism q111 q113  if q_totalduration>300
reg q95 i.fx_treat fie q117 exporter q119_40 q115 ccpapproval antiamerican nationalism q111 q113  if q_totalduration>300
reg q92 i.fx_treat fie q117 exporter q119_40 q115 ccpapproval antiamerican nationalism q111 q113  if q_totalduration>300
reg q93 i.fx_treat fie q117 exporter q119_40 q115 ccpapproval antiamerican nationalism q111 q113  if q_totalduration>300


**Table F2
reg fx_appreciate i.fx_treat##antiamericand fie q117 exporter q119_40 q115 ccpapproval  nationalism q111 q113 if q_totalduration>300
reg fx_appreciate i.fx_treat##usadversary fie q117 exporter q119_40 q115 ccpapproval  nationalism q111 q113  if q_totalduration>300
reg fx_appreciate i.fx_treat##c.antiamerican fie q117 exporter q119_40 q115 ccpapproval  nationalism q111 q113 if q_totalduration>300


**Figure F1 
interflex fx_appreciate fxtreatencourage antiamericand fxtreatthreat fxtreatthreatantiamericand fie q117 exporter q119_40 q115 ccpapproval  nationalism q111 q113 if q_totalduration>300, type(linear) 
interflex fx_appreciate  fxtreatthreat  antiamericand fxtreatencourage  fxtreatencourageantiamericand fie q117 exporter q119_40 q115 ccpapproval  nationalism q111 q113 if q_totalduration>300, type(linear) 


*Figure F2
interflex fx_appreciate fxtreatencourage usadversary fxtreatthreat fxthreatusadvers  fie q117 exporter q119_40 q115 ccpapproval  nationalism q111 q113 if q_totalduration>300, type(linear)
interflex fx_appreciate  fxtreatthreat  usadversary fxtreatencourage  fxencourageusadvers fie q117 exporter q119_40 q115 ccpapproval  nationalism q111 q113 if q_totalduration>300, type(linear)


**Figure F3
interflex fx_appreciate fxtreatencourage  antiamerican fxtreatthreat fxtreatthreatantiamerican fie q117 exporter q119_40 q115 ccpapproval  nationalism q111 q113 if q_totalduration>300, type(linear) 
interflex fx_appreciate fxtreatthreat   antiamerican fxtreatencourage fxtreatencourageantiamerican fie q117 exporter q119_40 q115 ccpapproval  nationalism q111 q113 if q_totalduration>300, type(linear) 


**Figure F4
interflex fx_appreciate fxtreatencourage  antiamerican fxtreatthreat fxtreatthreatantiamerican fie q117 exporter q119_40 q115 ccpapproval  nationalism q111 q113 if q_totalduration>300, type(kernel) 
interflex fx_appreciate fxtreatthreat   antiamerican fxtreatencourage fxtreatencourageantiamerican fie q117 exporter q119_40 q115 ccpapproval  nationalism q111 q113 if q_totalduration>300, type(kernel) 


**Figure G1
reg fx_appreciate i.fx_treat if q_totalduration>300 & q115>3 & q115!=.
margins, dydx(i.fx_treat)
marginsplot, name(highinc, replace)
reg fx_appreciate i.fx_treat if q_totalduration>300 & q115<4 & q115!=.
margins, dydx(i.fx_treat)
marginsplot, name(lowinc, replace)

reg fx_appreciate i.fx_treat if q_totalduration>300 & assets==3
margins, dydx(i.fx_treat)
marginsplot, name(highasset, replace)
reg fx_appreciate i.fx_treat if q_totalduration>300 & assets<3 
margins, dydx(i.fx_treat)
marginsplot, name(lowasset, replace)

graph combine lowinc highinc lowasset highasset, ycommon cols(2)


**Figure H1
ciplot q102_1 if q_totalduration>300, by(fx_treat)


**Table I1
*Benefit American Economy
medeff (regress q93 fxtreatthreat fxtreatencourage) (regress fx_appreciate q93 fxtreatthreat fxtreatencourage) if q_totalduration>300, treat(fxtreatencourage) mediate(q93) level(90)
medeff (regress q93 fxtreatthreat fxtreatencourage) (regress fx_appreciate q93 fxtreatthreat fxtreatencourage) if q_totalduration>300, treat(fxtreatthreat) mediate(q93) level(90)
medeff (regress q93 fxtreatthreat fxtreatencourage) (regress fx_appreciate q93 fxtreatthreat fxtreatencourage) if q_totalduration>300 & usadversary==1, treat(fxtreatencourage) mediate(q93) level(90)
medeff (regress q93 fxtreatthreat fxtreatencourage) (regress fx_appreciate q93 fxtreatthreat fxtreatencourage) if q_totalduration>300 & usadversary==1, treat(fxtreatthreat) mediate(q93) level(90)
medeff (regress q93 fxtreatthreat fxtreatencourage) (regress fx_appreciate q93 fxtreatthreat fxtreatencourage) if q_totalduration>300 & usadversary==0, treat(fxtreatencourage) mediate(q93) level(90)
medeff (regress q93 fxtreatthreat fxtreatencourage) (regress fx_appreciate q93 fxtreatthreat fxtreatencourage) if q_totalduration>300 & usadversary==0, treat(fxtreatthreat) mediate(q93) level(90)

*Benefit Chinese Economy
medeff (regress q94 fxtreatthreat fxtreatencourage) (regress fx_appreciate q94 fxtreatthreat fxtreatencourage) if q_totalduration>300, treat(fxtreatencourage) mediate(q94) level(90)
medeff (regress q94 fxtreatthreat fxtreatencourage) (regress fx_appreciate q94 fxtreatthreat fxtreatencourage) if q_totalduration>300, treat(fxtreatthreat) mediate(q94) level(90)
medeff (regress q94 fxtreatthreat fxtreatencourage) (regress fx_appreciate q94 fxtreatthreat fxtreatencourage) if q_totalduration>300 & usadversary==1, treat(fxtreatencourage) mediate(q94) level(90)
medeff (regress q94 fxtreatthreat fxtreatencourage) (regress fx_appreciate q94 fxtreatthreat fxtreatencourage) if q_totalduration>300 & usadversary==1, treat(fxtreatthreat) mediate(q94) level(90)
medeff (regress q94 fxtreatthreat fxtreatencourage) (regress fx_appreciate q94 fxtreatthreat fxtreatencourage) if q_totalduration>300 & usadversary==0, treat(fxtreatencourage) mediate(q94) level(90)
medeff (regress q94 fxtreatthreat fxtreatencourage) (regress fx_appreciate q94 fxtreatthreat fxtreatencourage) if q_totalduration>300 & usadversary==0, treat(fxtreatthreat) mediate(q94) level(90)

*Improve China's Reputation
medeff (regress q95 fxtreatthreat fxtreatencourage) (regress fx_appreciate q95 fxtreatthreat fxtreatencourage) if q_totalduration>300, treat(fxtreatencourage) mediate(q95) level(90)
medeff (regress q95 fxtreatthreat fxtreatencourage) (regress fx_appreciate q95 fxtreatthreat fxtreatencourage) if q_totalduration>300, treat(fxtreatthreat) mediate(q95) level(90)
medeff (regress q95 fxtreatthreat fxtreatencourage) (regress fx_appreciate q95 fxtreatthreat fxtreatencourage) if q_totalduration>300 & usadversary==1, treat(fxtreatencourage) mediate(q95) level(90)
medeff (regress q95 fxtreatthreat fxtreatencourage) (regress fx_appreciate q95 fxtreatthreat fxtreatencourage) if q_totalduration>300 & usadversary==1, treat(fxtreatthreat) mediate(q95) level(90)
medeff (regress q95 fxtreatthreat fxtreatencourage) (regress fx_appreciate q95 fxtreatthreat fxtreatencourage) if q_totalduration>300 & usadversary==0, treat(fxtreatencourage) mediate(q95) level(90)
medeff (regress q95 fxtreatthreat fxtreatencourage) (regress fx_appreciate q95 fxtreatthreat fxtreatencourage) if q_totalduration>300 & usadversary==0, treat(fxtreatthreat) mediate(q95) level(90)

*Improve Trade Relations
medeff (regress q92 fxtreatthreat fxtreatencourage) (regress fx_appreciate q92 fxtreatthreat fxtreatencourage) if q_totalduration>300, treat(fxtreatencourage) mediate(q92) level(90)
medeff (regress q92 fxtreatthreat fxtreatencourage) (regress fx_appreciate q92 fxtreatthreat fxtreatencourage) if q_totalduration>300, treat(fxtreatthreat) mediate(q92) level(90)
medeff (regress q92 fxtreatthreat fxtreatencourage) (regress fx_appreciate q92 fxtreatthreat fxtreatencourage) if q_totalduration>300 & usadversary==1, treat(fxtreatencourage) mediate(q92) level(90)
medeff (regress q92 fxtreatthreat fxtreatencourage) (regress fx_appreciate q92 fxtreatthreat fxtreatencourage) if q_totalduration>300 & usadversary==1, treat(fxtreatthreat) mediate(q92) level(90)
medeff (regress q92 fxtreatthreat fxtreatencourage) (regress fx_appreciate q92 fxtreatthreat fxtreatencourage) if q_totalduration>300 & usadversary==0, treat(fxtreatencourage) mediate(q92) level(90)
medeff (regress q92 fxtreatthreat fxtreatencourage) (regress fx_appreciate q92 fxtreatthreat fxtreatencourage) if q_totalduration>300 & usadversary==0, treat(fxtreatthreat) mediate(q92) level(90)


**Table I2
*beliefs about US economy
reg q93 i.fx_treat if q_totalduration>300
reg q93 i.fx_treat if q_totalduration>300 & antiamericand==1
reg q93 i.fx_treat if q_totalduration>300 & antiamericand==0

*beliefs about Chinese economy
reg q94 i.fx_treat if q_totalduration>300
reg q94 i.fx_treat if q_totalduration>300 & antiamericand==1
reg q94 i.fx_treat if q_totalduration>300 & antiamericand==0

*beliefs about Chinese reputation
reg q95 i.fx_treat if q_totalduration>300
reg q95 i.fx_treat if q_totalduration>300 & antiamericand==1
reg q95 i.fx_treat if q_totalduration>300 & antiamericand==0

*beliefs about trade relations
reg q92 i.fx_treat if q_totalduration>300
reg q92 i.fx_treat if q_totalduration>300 & antiamericand==1
reg q92 i.fx_treat if q_totalduration>300 & antiamericand==0


**Table I3
*beliefs about US economy
reg q93 i.fx_treat if q_totalduration>300
reg q93 i.fx_treat if q_totalduration>300 & usadversary==1
reg q93 i.fx_treat if q_totalduration>300 & usadversary==0

*beliefs about Chinese economy
reg q94 i.fx_treat if q_totalduration>300
reg q94 i.fx_treat if q_totalduration>300 & usadversary==1
reg q94 i.fx_treat if q_totalduration>300 & usadversary==0

*beliefs about Chinese reputation
reg q95 i.fx_treat if q_totalduration>300
reg q95 i.fx_treat if q_totalduration>300 & usadversary==1
reg q95 i.fx_treat if q_totalduration>300 & usadversary==0

*beliefs about trade relations
reg q92 i.fx_treat if q_totalduration>300
reg q92 i.fx_treat if q_totalduration>300 & usadversary==1
reg q92 i.fx_treat if q_totalduration>300 & usadversary==0


**Table I4
*Panel A
reg fx_appreciate q93 if q_totalduration>300 
reg fx_appreciate q94 if q_totalduration>300 
reg fx_appreciate q95 if q_totalduration>300 
reg fx_appreciate q92 if q_totalduration>300

*Panel B
reg fx_appreciate q93 if q_totalduration>300 & antiamericand==1
reg fx_appreciate q94 if q_totalduration>300 & antiamericand==1
reg fx_appreciate q95 if q_totalduration>300 & antiamericand==1
reg fx_appreciate q92 if q_totalduration>300 & antiamericand==1

*Panel C
reg fx_appreciate q93 if q_totalduration>300 & antiamericand==0
reg fx_appreciate q94 if q_totalduration>300 & antiamericand==0
reg fx_appreciate q95 if q_totalduration>300 & antiamericand==0
reg fx_appreciate q92 if q_totalduration>300 & antiamericand==0


**Table I5
*Panel A
reg fx_appreciate q93 if q_totalduration>300 
reg fx_appreciate q94 if q_totalduration>300 
reg fx_appreciate q95 if q_totalduration>300 
reg fx_appreciate q92 if q_totalduration>300

*Panel B
reg fx_appreciate q93 if q_totalduration>300 & usadversary==1
reg fx_appreciate q94 if q_totalduration>300 & usadversary==1
reg fx_appreciate q95 if q_totalduration>300 & usadversary==1
reg fx_appreciate q92 if q_totalduration>300 & usadversary==1

*Panel C
reg fx_appreciate q93 if q_totalduration>300 & usadversary==0
reg fx_appreciate q94 if q_totalduration>300 & usadversary==0
reg fx_appreciate q95 if q_totalduration>300 & usadversary==0
reg fx_appreciate q92 if q_totalduration>300 & usadversary==0
